# Supplementary material for: Bottom-up meets top-down: tailored raspberry-like Fe3O4–Pt nanocrystal superlattices
Source: Royal Society of Chemistry journal article supplement (doi:10.1039/c8nr00655e), 2018-01-01
Supplement: c8nr00655e1.pdf [file c8nr00655e1.pdf]

## Supplementary Information

### Bottom-up Meets Top-down: Tailored Raspberry-like $\text{Fe}_3\text{O}_4\text{-Pt}$ Nanocrystal Superlattices

Fen Qiu,<sup>a †</sup> René H. J. Vervuurt,<sup>b †</sup> Marcel A. Verheijen,<sup>b,c</sup> Edmond W. Zaia,<sup>a,d</sup> Erin B. Creel,<sup>a,d</sup>

Youngsang Kim,<sup>a</sup> Jeffrey J. Urban,<sup>\*a</sup> Ageeth A. Bol<sup>\*b</sup>

## **Table of contents**

### **1. Experimental Section**

1.1. Synthesis of  $\text{Fe}_3\text{O}_4$

1.2. Self-assembly of  $\text{Fe}_3\text{O}_4$  superlattices

1.3. Atomic Layer Deposition

1.4. TEM

1.5. STEM

1.6. X-ray Photoelectron Spectroscopy

1.7. Fabrication of Electrode

1.8. Photocurrent measurement

1.9. IPCE measurement

## 1. Experimental Section

**1.1. Synthesis of Fe<sub>3</sub>O<sub>4</sub>:** Fe<sub>3</sub>O<sub>4</sub> NPs were synthesized under argon atmosphere using standard Schlenk line techniques according to the literature method.<sup>[1]</sup>

**1.2. Self-assembly of Fe<sub>3</sub>O<sub>4</sub> superlattices:** a solution of Fe<sub>3</sub>O<sub>4</sub> NPs was drop-cast onto the surface of diethylene glycol (DEG) in a Teflon well swiftly, and covered with glass to ensure a slow evaporation of solvent form a film. Silicon monoxide TEM grids were used here for transferring the fluid supported film upon drying of the NP solvent for the studies in this report.

**1.3. Atomic Layer Deposition:** Pt was deposited on the Fe<sub>3</sub>O<sub>4</sub> super lattices by ALD, in a home-built ALD reactor equipped with an inductively coupled plasma (ICP) source.<sup>[2]</sup> The base pressure of the system was  $\sim 10^{-6}$  mbar. Before ALD the Fe<sub>3</sub>O<sub>4</sub> particles were cleaned by a 3 min O<sub>2</sub> plasma exposure (0.01 mbar, 100W), to remove any remaining oleylamine and oleic acid ligands from the Fe<sub>3</sub>O<sub>4</sub> super lattice synthesis process. **Due to carbon build up on the samples as a result of air exposure, it is difficult to confirm the removal of these ligands with any ex-situ technique, for example, XPS. It should be noted that without O<sub>2</sub> pre-treatment no uniform Pt particle growth on the Fe<sub>3</sub>O<sub>4</sub> was obtained, which is an indirect proof that some, if not all carbon has been removed. Additionally, without O<sub>2</sub> pre-treatment a low contrast (low-atomic number) shell could sometimes be observed around the particles in TEM, possibly indicating the remnants of the ligand molecules, shown in Figure S7 in SI After plasma treatment this shell was no longer observed and the Pt growth was uniform across the sample.**

The Pt ALD process consisted of a 4 s MeCpPtMe<sub>3</sub> precursor dose and a 5 s O<sub>2</sub> gas reaction step, separated by pump steps. The table temperature was set to 300 °C, while the reactor walls were kept at 100 °C. The effective sample temperature during deposition was approximately 120 °C, as determined by *in-situ* spectroscopic ellipsometry (SE) using a Si reference sample. The O<sub>2</sub> pressure during the reaction step was 0.01 mbar. The relatively low pressure during Pt deposition results in a poor thermal contact between the substrates used and the table heater. The effective

sample temperature is therefore much lower than 300 °C and closer 120 °C, as determined by *in-situ* spectroscopic ellipsometry (SE) using a Si reference sample. The low sample temperature prevents Pt growth on the SiO<sub>2</sub> substrates, making the selective deposition of Pt on Fe<sub>3</sub>O<sub>4</sub> possible.<sup>[3]</sup> This is because the thermal energy is insufficient to dissociate O<sub>2</sub> and remove the MeCpPtMe<sub>3</sub> precursor ligands in the O<sub>2</sub> half cycle on SiO<sub>2</sub>.<sup>[4]</sup> Pt growth does occur on the Fe<sub>3</sub>O<sub>4</sub> particles, most likely due to its catalytic properties, such as its ability to dissociate H<sub>2</sub>O.<sup>[5]</sup> For some of the experiments the Pt ALD deposition was interrupted by a 3 min O<sub>2</sub> Plasma exposure (0.01 mbar, 100W) to remove surface carbon that accumulated on the Pt and Fe<sub>3</sub>O<sub>4</sub> during growth.

**1.4. Transmission electron microscope (TEM):** TEM images were acquired on an CM200 operated at 200 keV.

**1.5. Scanning transmission electron microscope (STEM):** After Pt ALD the samples were analyzed by a JEOL ARM 200 probe corrected STEM, operated at 200 kV. The images were acquired in high angle annular dark field (HAADF) mode. The Pt particle size was determined by analyzing several (minimum of 3 per sample) HAADF STEM images using the Image J software package.

**1.6. X-ray Photoelectron Spectroscopy:** X-ray Photoelectron Spectroscopy (XPS) was used to investigate the electronic structure of the Pt-Fe<sub>3</sub>O<sub>4</sub> composite nanoparticle system. Specifically, the Pt 4f and Fe 2p core levels were probed. A PHI 5400 X-ray Photoelectron Spectroscopy (XPS) System with a conventional Mg K $\alpha$  source operated at 350 W was used for this purpose. Pass energy of 20 eV was used for narrow scan spectra, corresponding to an energy resolution of ~700 meV. All peak positions were referenced to the C 1s of 284.5 eV.

**1.7. Fabrication of Electrode:** A circular glass substrate (19 mm diameter and 0.5 mm thick, ProSciTech) was cleaned using solvents (acetone and isopropyl alcohol) followed by ultrapure water (Milli-Q) then air plasma (for 3 min). The air plasma cleaning enhances the adhesion of metals on the glass. Ag and Ti was deposited using an e-beam evaporator through a shadow

mask having a dumbbell-like shape, where Ti (3 nm thick) is used to promote the adhesion of Ag thin film (100 nm thick) to the glass. Subsequently, on top of Ag thin film, TiO<sub>2</sub> film (80 nm thick) was deposited using an e-beam evaporator except the contact area. The substrate temperature kept 350°C while depositing TiO<sub>2</sub>.

**1.8. Photocurrent measurement:** We have built a highly sensitive photocurrent measurement setup for the electrochemical cell system using the lock-in technique. A sample immersed in a glass electrochemical cell with a quartz window is illuminated by a light source (Xe lamp, ~ 850 mW/cm<sup>2</sup>) through a condenser lens (transmission: 350 nm – 700 nm) and a chopper. The light chopping (3 Hz) is synchronized with a lock-in amplifier (SRS 850) to lock-in the square wave of modulated photocurrent generated by the chopped light. The lock-in amplifier is also linked with a potentiostat (BioLogic SP-200). The lock-in amplifier generates the r.m.s. amplitude of the first harmonic of the signal, which is the photocurrent. In this manner, we can measure the amplitude of photocurrent while sweeping the potential applied to the working electrode. The condenser lens that blocks IR wavelengths and the light chopping in a short period rule out any heating effect on the surface of our samples.

**1.9. IPCE measurements:** Incident to photon-to-current efficiency (IPCE) is a potential-dependent measurement of how efficiently photons of a given wavelength are converted to charge transfer in an electrochemical cell (three electrode configuration). A highly-sensitive IPCE setup was built incorporating the lock-in technique with a potentiostat (Biologic SP-200) and a monochromator (Oriel Cornerstone 130). A visible wavelength of light from a Xe lamp is selected by a monochromator and illuminates the photoelectrode surface through a chopper. The on and off pattern of illumination created by the chopper generates a 3 Hz square wave signal which is fed into the lock-in amplifier for enhanced signal-to-noise ratio. The photocurrent of a Si photodiode is measured as a reference for photon density. IPCE was measured for each sample type at visible wavelengths in 10 nm increments for a series of chronoamperometric scans at

various potentials. Figure S5 shows IPCE results measured in Ar-saturated 1M NaOH at 0.4 V vs *Ag/AgCl*.

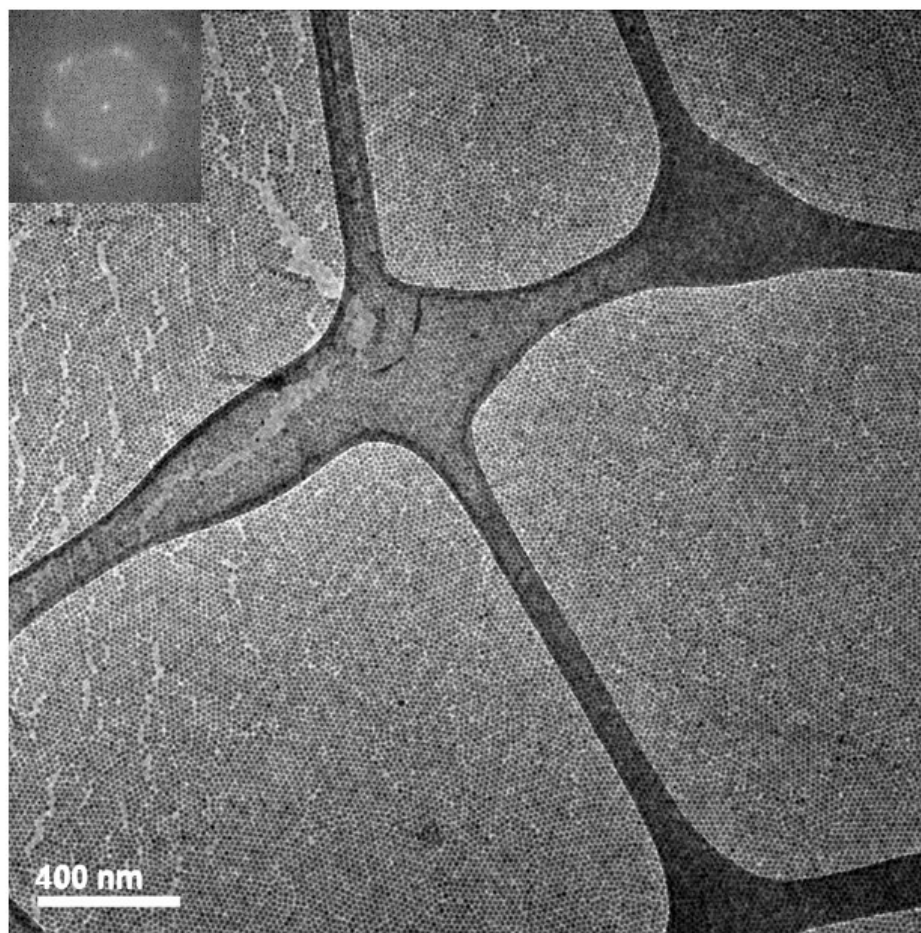

**Figure S1** TEM and FFT of  $\text{Fe}_3\text{O}_4$  NP Superlattices

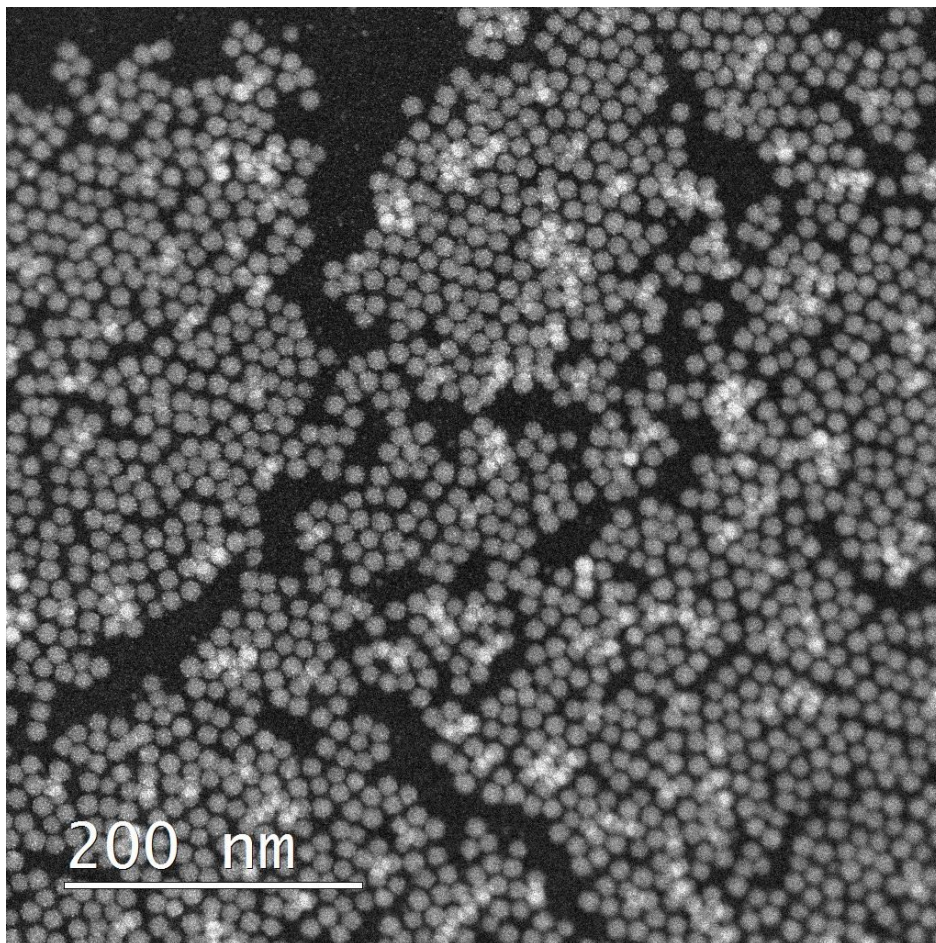

**Figure S2** Scanning transmission electron microscopy (STEM) of  $\text{Fe}_3\text{O}_4$  NP Superlattices formed by drop casting

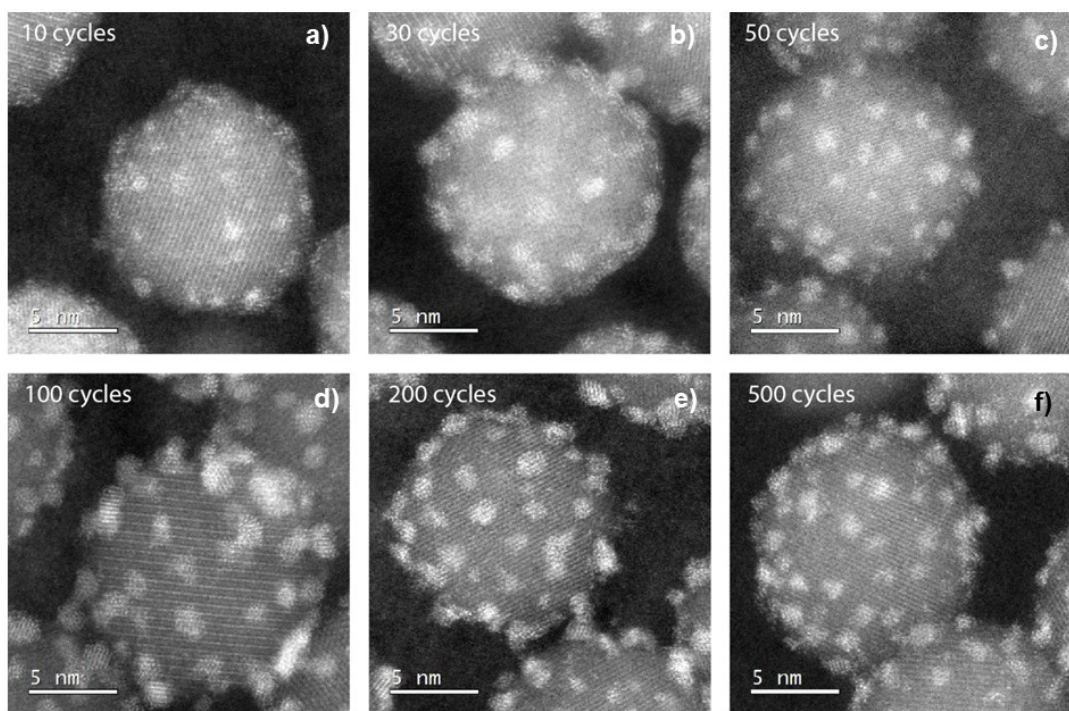

**Figure S3** High angle annular dark field (HAADF) high resolution scanning transmission electron microscopy (HR-STEM) images of NPs after 10, 30, 50, 100, 200 and 500 Pt ALD cycles respectively.

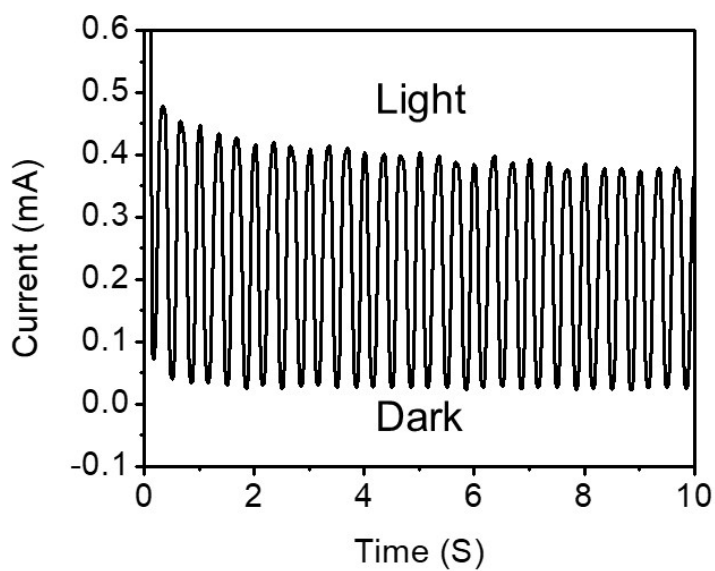

**Figure S4** Chronoamperometry with chopped-light illumination (3 Hz). Current was recorded at a constant potential 0.2 V vs. Ag/AgCl with in Ar-saturated 1 M NaOH



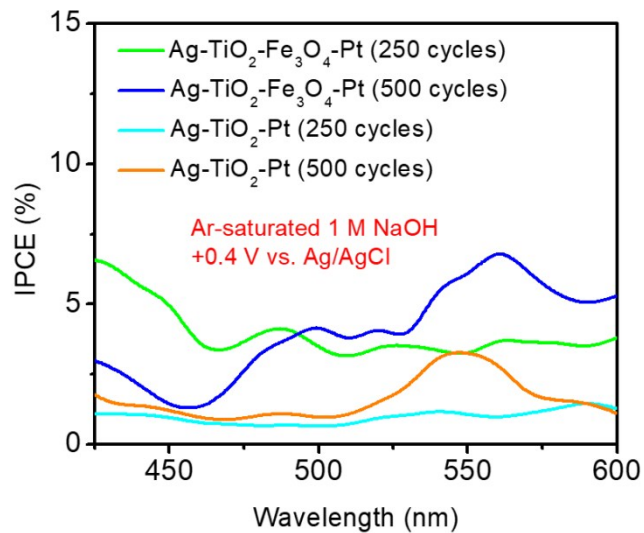

**Figure S5** IPCE of Ag-TiO<sub>2</sub>-Pt and Ag-TiO<sub>2</sub>-Fe<sub>3</sub>O<sub>4</sub>-Pt with 250 cycles and 500 cycles of ALD

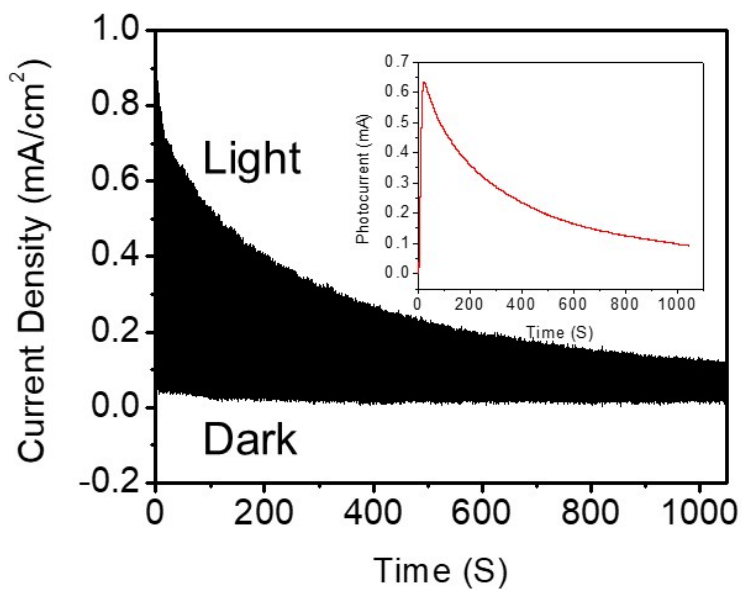

**Figure S6** Durability Test of Dark and Light Current Density of Ag-TiO<sub>2</sub>-Fe<sub>3</sub>O<sub>4</sub>-Pt Composites for 1000 Seconds (The inset is the photocurrent)

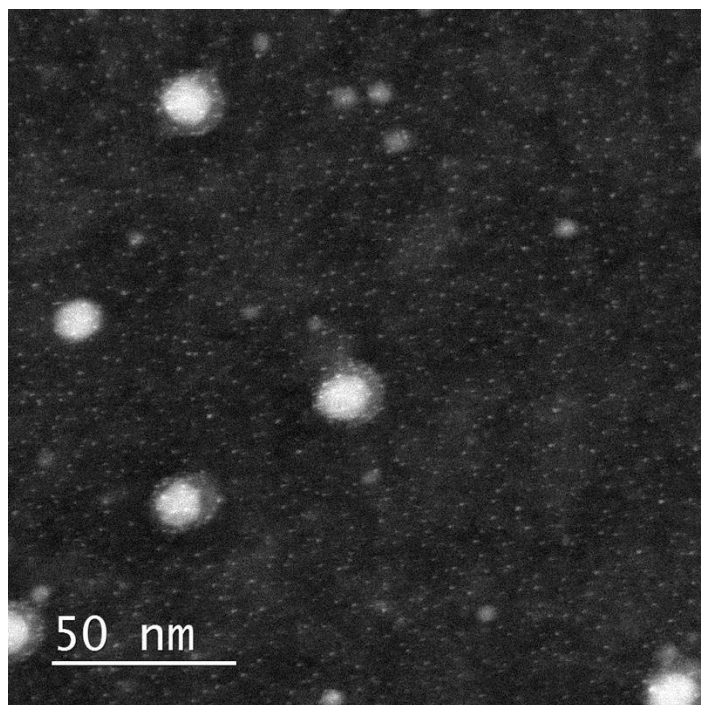

**Figure S7** High angle annular dark field (HAADF) high resolution scanning transmission electron microscopy (HR-STEM) images of NPs 500 Pt ALD cycles. In this case the O<sub>2</sub> plasma treatment was insufficient to fully clean the samples. A low contrast (low atomic number) shell can be observed around the Fe<sub>3</sub>O<sub>4</sub> particles.

#### References

- [1] J. Park, K. J. An, Y. S. Hwang, J. G. Park, H. J. Noh, J. Y. Kim, J. H. Park, N. M. Hwang, T. Hyeon, *Nature Materials* **2004**, *3*, 891-895.
- [2] H. C. M. Knoops, A. J. M. Mackus, M. E. Donders, M. C. M. van de Sanden, P. H. L. Notten, W. M. M. Kessels, *Electrochemical and Solid State Letters* **2009**, *12*, G34-G36.
- [3] A. J. M. Mackus, S. A. F. Dielissen, J. J. L. Mulders, W. M. M. Kessels, *Nanoscale* **2012**, *4*, 4477-4480.
- [4] A. J. M. Mackus, N. Leick, L. Baker, W. M. M. Kessels, *Chem Mater* **2012**, *24*, 1752-1761.
- [5] N. Mulakaluri, R. Pentcheva, M. Scheffler, *J Phys Chem C* **2010**, *114*, 11148-11156.
